# Supplementary material for: Structural basis of substrate recognition and translocation by human very long-chain fatty acid transporter ABCD1
Source: PubMed Central journal article supplement (PMC9177597; doi:10.1038/s41467-022-30974-5), 2022-06-08
Supplement: 41467_2022_30974_MOESM1_ESM.pdf [file 41467_2022_30974_MOESM1_ESM.pdf]

4 was constructed by replacing the N-terminal 63 residues with the N-terminal 65 residues of PMP-  
5 4 The N-terminal Lys65 of PMP-4 is indicated by an asterisk. **b**, The Western blot analysis to  
6 quantify the expression levels of the variants in the total cell extracts,  $\beta$ -actin served as an internal  
7 control (n=1). The immunoblot of hABCD1, chABCD1 and mutants of chABCD1 were completed  
8 in three different experiments, and controls of  $\beta$ -actin and chABCD1 were run on each blot, and  
9 the PVDF membranes were sliced into stripes according to a pre-stained protein marker. The  
10 expression levels were shown in the bar chart normalized by chABCD1/ $\beta$ -actin (%). The Western  
11 blot analysis results is a representatives (n=1) of many times optimized experiments. Source data  
12 are provided as a Source Data file. **c**. Representative size-exclusion chromatography profiles and  
13 SDS-PAGE analysis of chimeric ABCD1 (chABCD1) and human ABCD1 (hABCD1) using a  
14 Superdex 200 increase 10/300 GL SEC column. The peak fractions around 10 mL for human  
15 ABCD1 and 10.2 mL for chimeric ABCD1 were pooled and concentrated for biochemical and  
16 structural studies. The purified protein was visualized by Coomassie-blue stained SDS-PAGE and  
17 bands for chimeric ABCD1 and human ABCD1 were indicated by black rectangles. The  
18 chromatogram and SDS-PAGE are representatives of > 5 independent experiments that showed  
19 similar results. **d**, Structural formulas of compounds used in the ATPase activity assays. **e**,  
20 Substrate concentration-dependent ATPase activity of chABCD1 upon addition of C22:0-CoA in  
21 detergent of digitonin or LMNG+CHS. The data points were fitted with a Michaelis-Menten  
22 equation. All data points represent means of three independent measurements (n=3). Error bars  
23 indicate standard deviation.

24

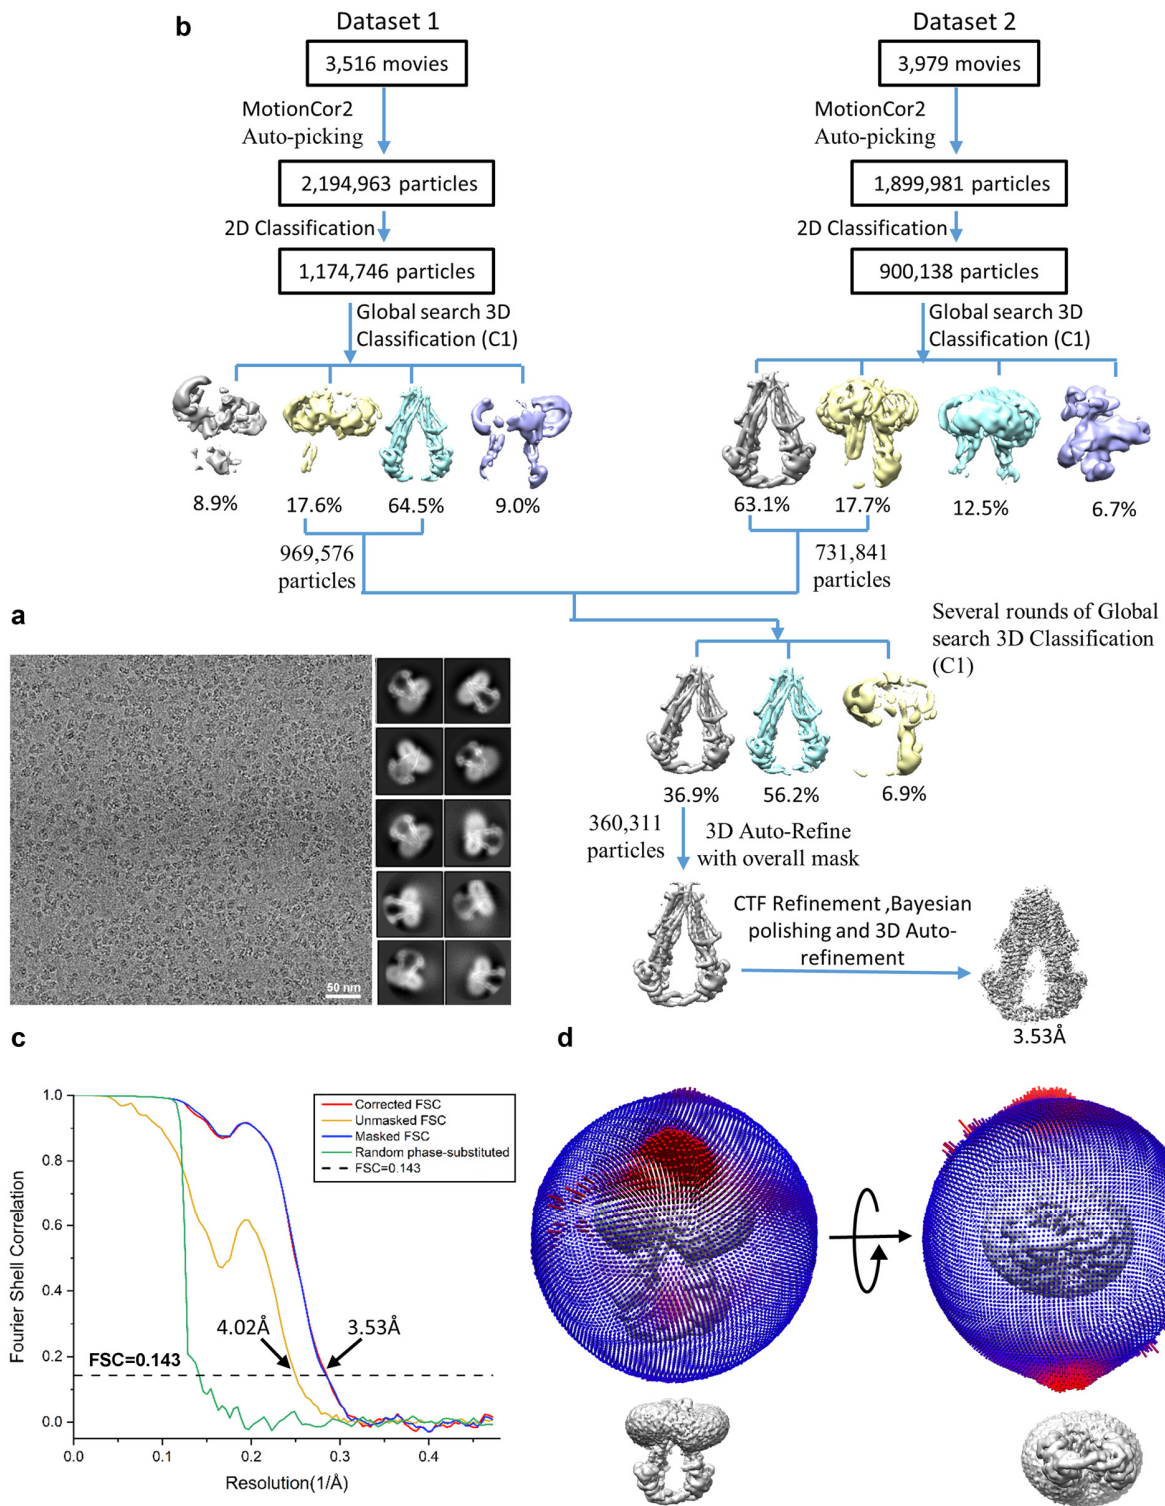

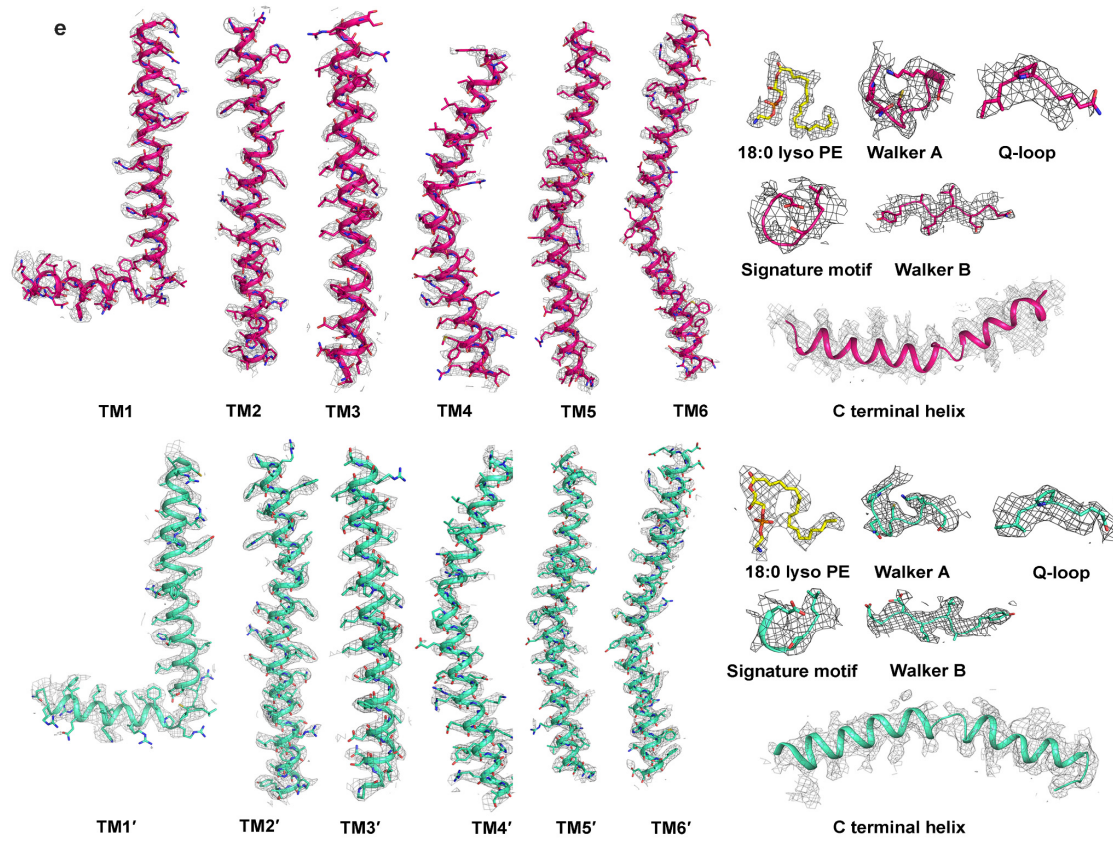

26

27 **Supplementary Fig. 2 Data processing and model building of apo-form ABCD1. a,**

28 Representative cryo-EM micrographs and 2D averages. Bar: 50 nm. The micrograph is a

29 representative of 7,459 cryo-EM images. **b,** Flowchart for cryo-EM data processing. **c,** Gold-

30 standard FSC curve for apo-form ABCD1 map generated using RELION 3.1. **d,** Euler angle

31 distribution of the classified particles used for the final 3D refinement of the overall map. **e,** cryo-

32 EM maps for representative segments of apo-form ABCD1. The structure was reconstructed with

33 C1 symmetry, so all the representative segments in two subunits are thus presented. Contour levels

34 are set at  $5\sigma$  for TM1-6 and two phosphatidyl ethanolamine (PE) molecules, and at  $4\sigma$  for the

35 consensus motif in NBDs including Walker A, Q-loop, signature motif, and Walker B. The contour

36 level for C-terminal helix is set at  $3\sigma$ .

37

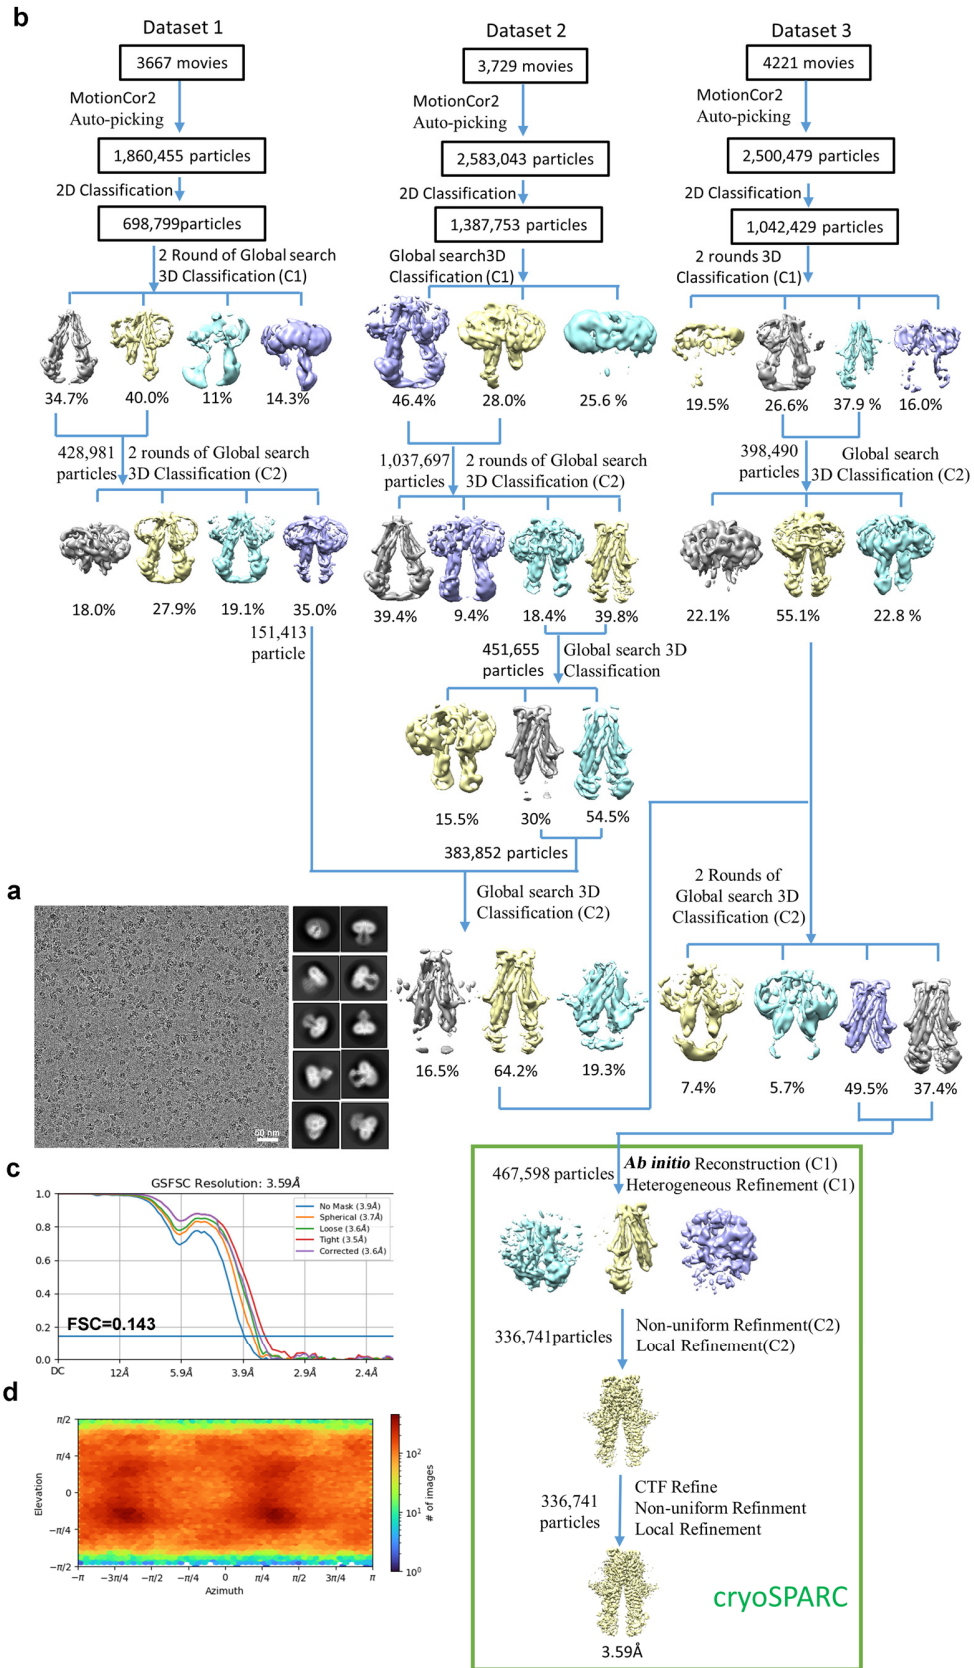

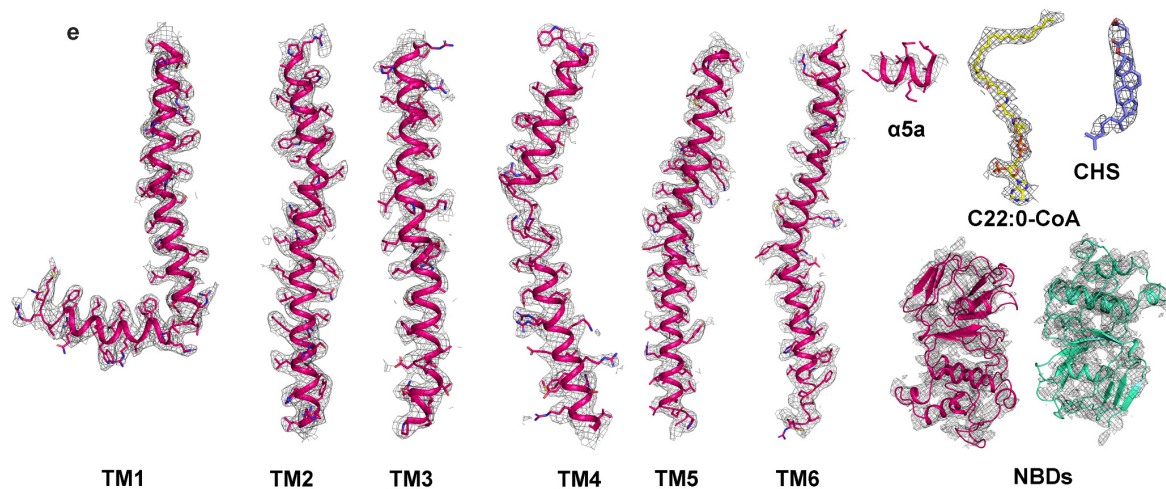

39

40 **Supplementary Fig. 3 Data processing and model building of C22:0-CoA-bound ABCD1. a,**

41 Representative cryo-EM micrographs and 2D averages. Bar: 50 nm. The micrograph is a

42 representative of 11,617 cryo-EM images. **b,** Flowchart for cryo-EM data processing. **c,** Gold-

43 standard FSC curve for C22:0-CoA-bound ABCD1 map generated using cryoSPARC 3.1. **d,** Euler

44 angle distribution of the classified particles used for the final 3D refinement of the overall map. **e,**

45 Cryo-EM densities of representative segments of the structure of C22:0-CoA-bound ABCD1. The

46 structure was reconstructed with C2 symmetry, and only one subunit presented. Contour levels are

47 set at  $5\sigma$  for TM1-6, C22:0-CoA, and at  $4\sigma$  for CHS. The contour level for the NBDs is set at  $3.5\sigma$ .

48

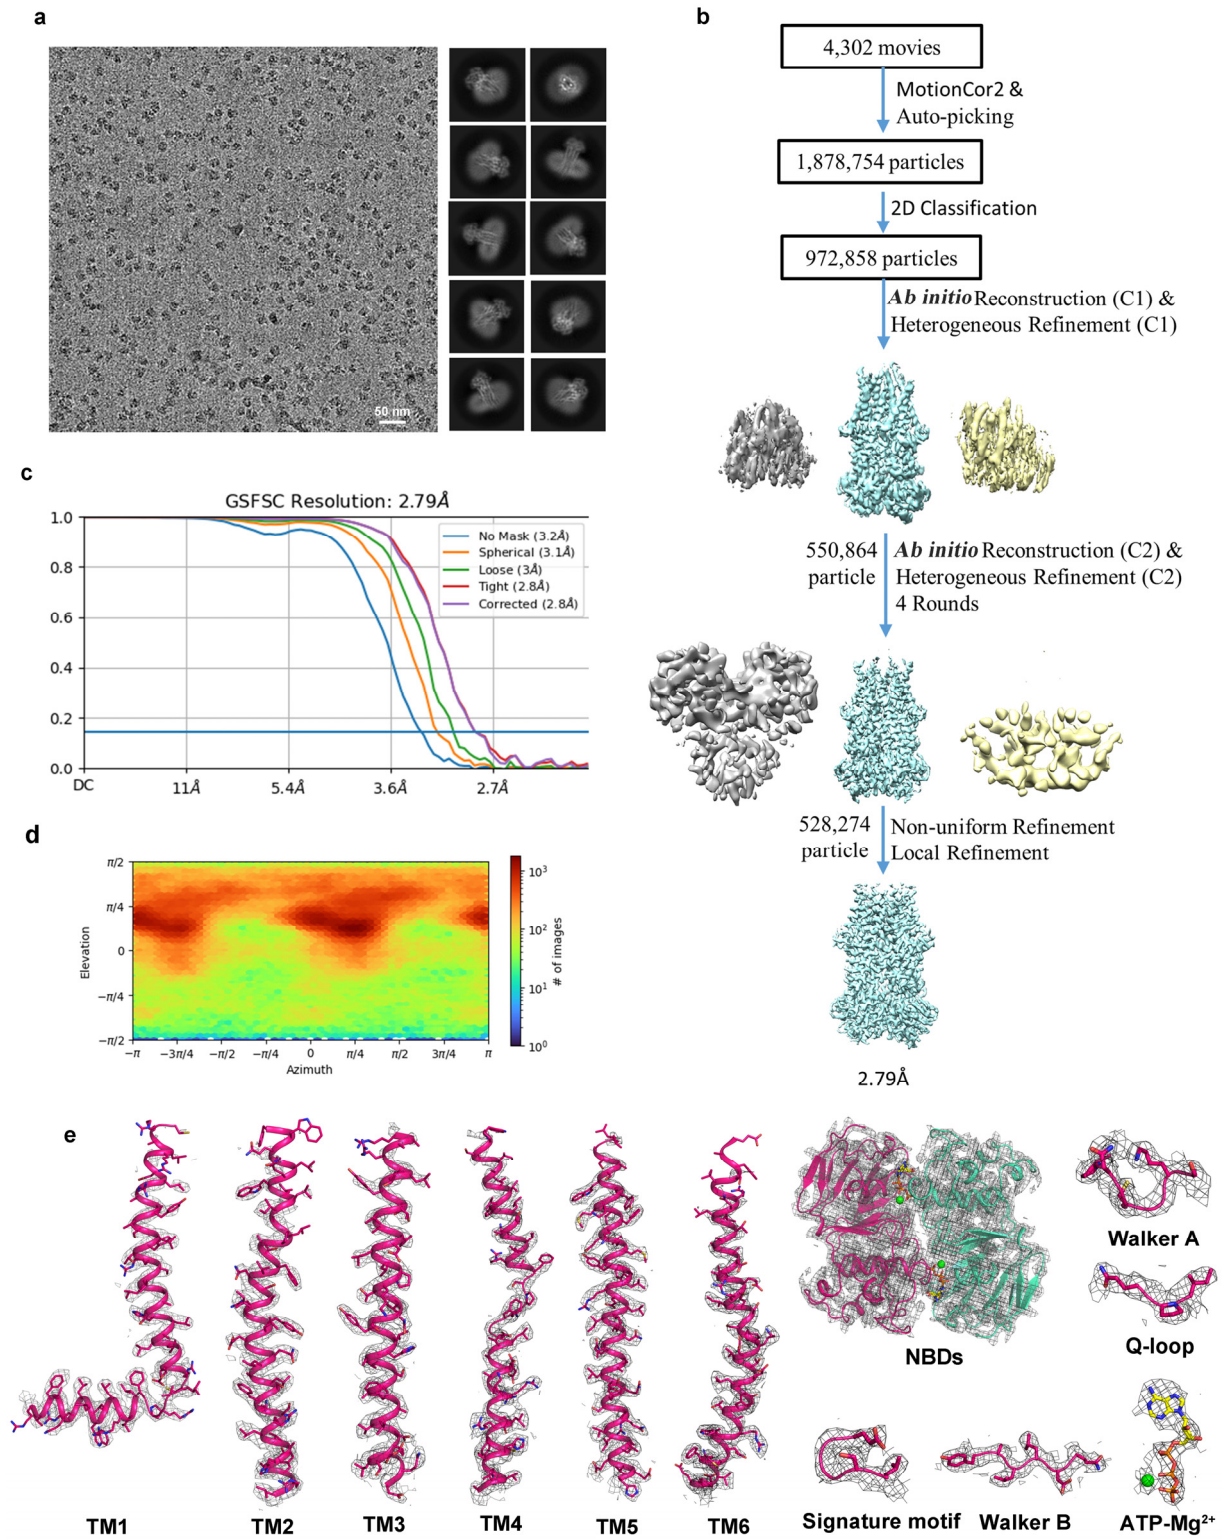

50 **Supplementary Fig. 4 Data processing and model building of ATP-bound ABCD1. a,**  
51 Representative cryo-EM micrographs and 2D averages. Bar: 50 nm. The micrograph is a  
52 representative of 4,302 cryo-EM images. **b,** Flowchart for cryo-EM data processing. **c,** Gold-  
53 standard FSC curve for ATP-bound ABCD1 map generated using cryoSPARC 3.1. **d,** Euler angle  
54 distribution of the classified particles used for the final 3D refinement of the overall map. **e,** Cryo-  
55 EM maps for representative segments of ATP-bound ABCD1. The structure was imposed with C2  
56 symmetry, so only segments in one subunit are presented. Contour levels are set at  $5\sigma$  for TM1-6,  
57 NBDs, ATP-Mg<sup>2+</sup> molecules and the consensus motif in NBDs including Walker A, Q-loop,  
58 signature motif, and Walker B.

59



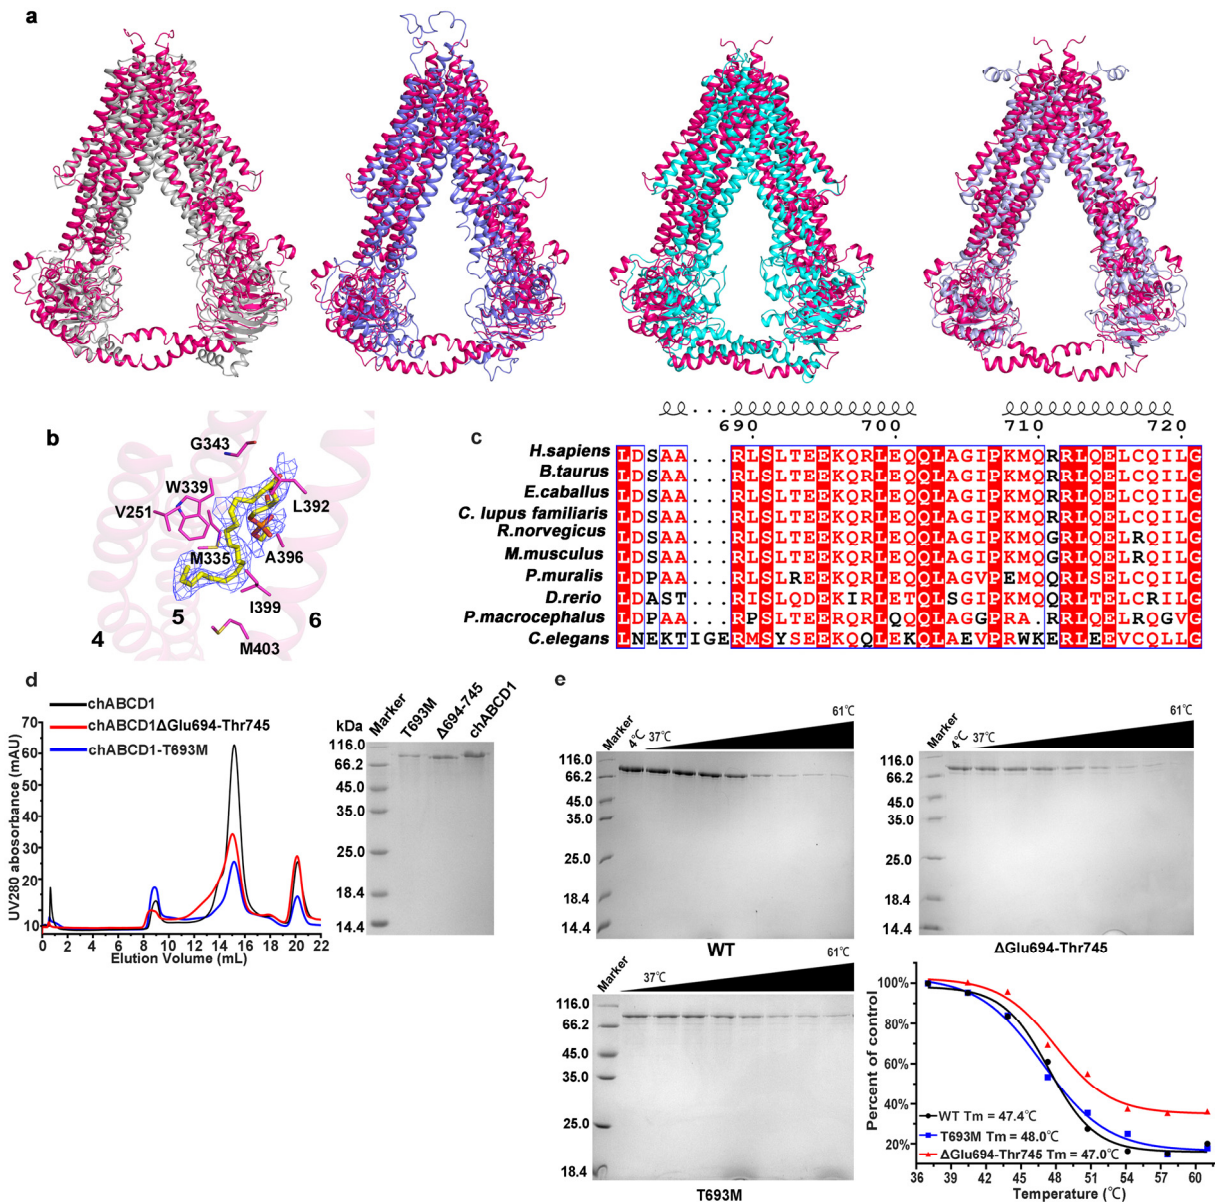

60

61 **Supplementary Fig. 5 Structural and biochemical characterizations of the apo-form ABCD1.**

62 **a**, Structural alignment of ABCD1 and the other four type-IV ABC transporters, yielding an  
 63 RMSD of 9.6, 13.7 10.7 and 26 Å, over 829, 858, 871 and 797 C $\alpha$ , respectively. Human ABCD1,  
 64 ABCB6 (PDB ID: 7EKM), ABCB11 (PDB ID: 6LR0), *Saccharomyces cerevisiae* Atm1 (PDB ID:  
 65 7SPL) and *Campylobacter jejuni* PglK (PDB ID: 5c76) are colored in rose, gray, marine, cyan and  
 66 lightblue, respectively. **b**, Density map for a phosphatidyl ethanolamine (PE) molecule. A PE

67 molecule (contour level at  $5\sigma$ ) was inserted into the hydrophobic cleft formed by TM5 and TM6.  
68 **c**, Multiple-sequence alignment for the C-terminal helix of ABCD1 and homologs. **d**, The size  
69 exclusion chromatography profiles of chABCD1 and mutants of  $\Delta$ Glu694-Thr745 and T693M  
70 using a Superose 6 Increase 10/300 SEC column. The peak fractions around 15mL were applied  
71 to SDS-PAGE and visualized by Coomassie-blue staining. The chromatogram and SDS-PAGE are  
72 representatives of > 3 independent experiments that showed similar results **e**, The thermal stability  
73 assays of chABCD1 and mutants of  $\Delta$ Glu694-Thr745 and T693M. One time thermal stability assay  
74 of chABCD1 and mutants of  $\Delta$ Glu694-Thr745 and T693M was performed in this project (n=1).  
75 Source data are provided as a Source Data file.

76

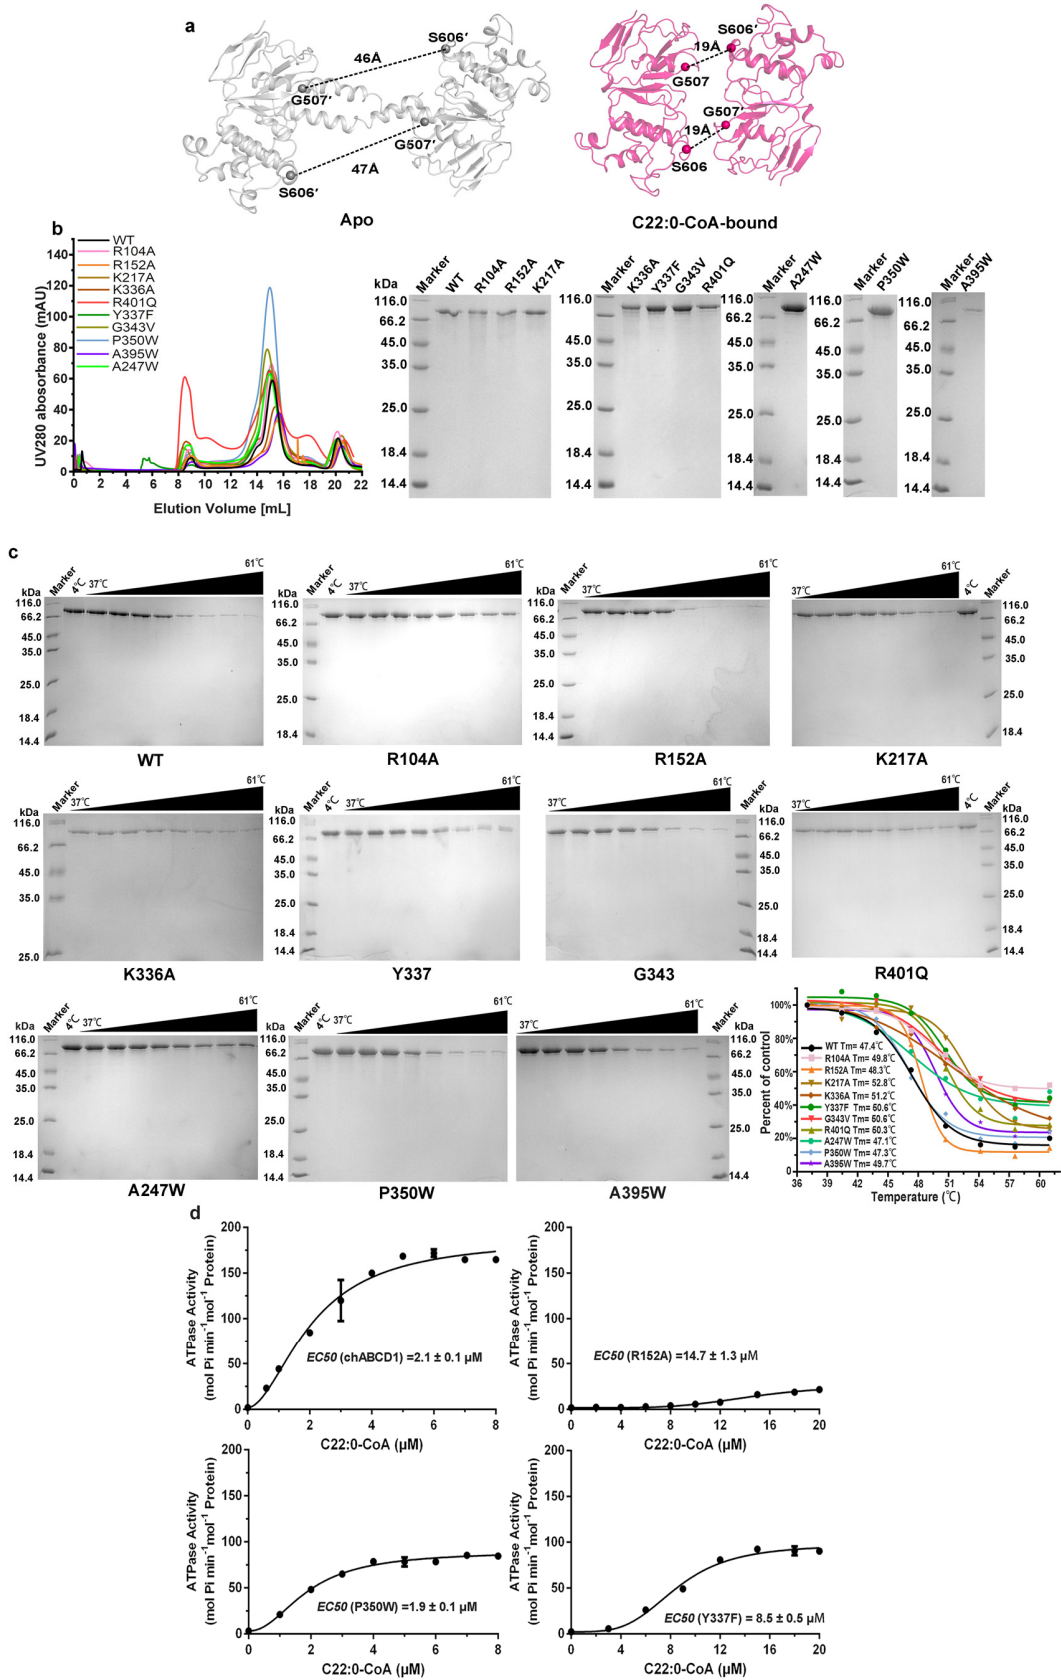

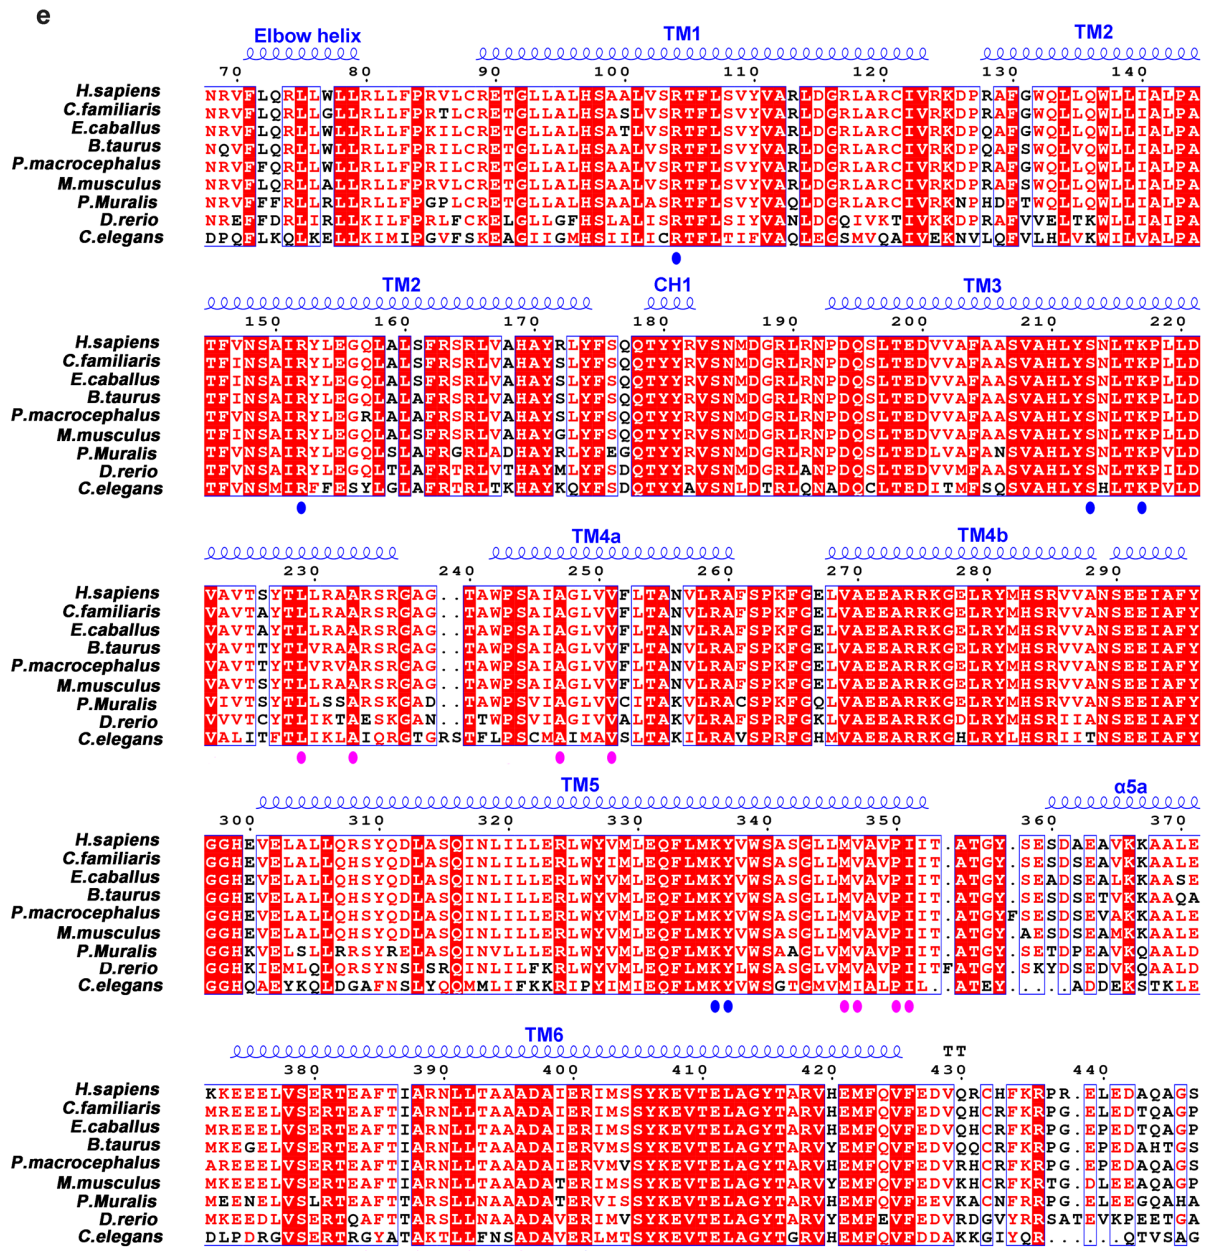

78

79 **Supplementary Fig. 6 Conformational changes of ABCD1 upon substrate binding. a,** The

80 NBDs in apo-form and C22:0-CoA-bound ABCD1, viewed from the peroxisome matrix. The C $\alpha$

81 distances between the Walker A and the signature motif are indicated. **b,** The size exclusion

82 chromatography profiles of chABCD1 and mutants related to substrate binding using a Superose

83 6 Increase 10/300 GL SEC column. The peak fractions around 15 mL were applied to SDS-PAGE

84 and visualized by Coomassie-blue staining. The chromatogram and SDS-PAGE are  
85 representatives of > 3 independent experiments that showed similar results. **c**, The thermal stability  
86 assays of chABCD1 and mutants related to substrate binding. One time thermal stability assays of  
87 chABCD1 and mutants was performed in this project (n=1). Source data are provided as a Source  
88 Data file. **d**, Substrate concentration-dependent ATPase activity of chABCD1 and mutants R152A,  
89 Y337F and P350W in detergent of LMNG+CHS, upon addition of C22:0-CoA. The data points  
90 were fitted with a Hill equation, based on which  $EC_{50}$  were calculated. All data points represent  
91 means of three independent measurements (n=3). Error bars indicate standard deviation. Source  
92 data are provided as a Source Data file. **e**, Multiple-sequence alignment of ABCD1 and homologs.  
93 Circles below the alignment indicate residues interacting with the CoA portion (blue) or the fatty  
94 acyl chain (pink) portion of the substrate.

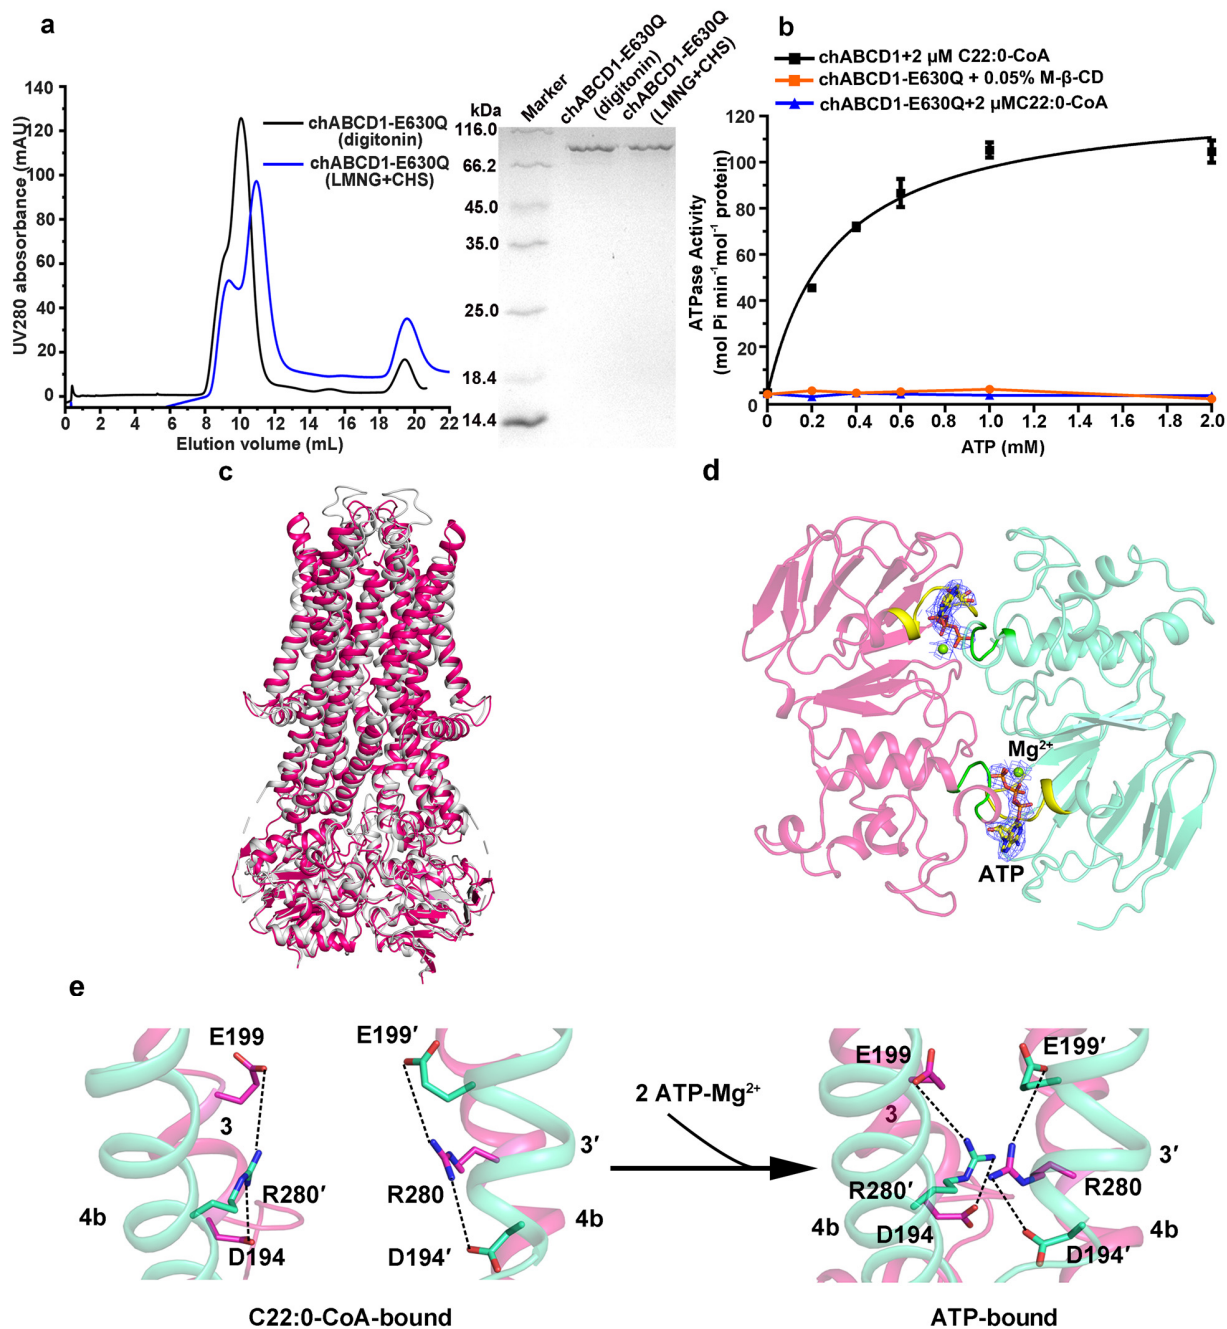

95

96 **Supplementary Fig. 7 The structural characterization of ATP-bound ABCD1.** a, The size  
 97 exclusion chromatography profiles of chABCD1-E630Q in detergent of digitonin and  
 98 LMNG+CHS with a Superdex 200 10/300 GL SEC column. The peak fractions were applied to  
 99 SDS-PAGE and visualized by Coomassie-blue staining. The chromatogram and SDS-PAGE are

100 representatives of 3 independent experiments that showed similar results. **b**, ATPase activities of  
101 chABCD1-E630Q in LMNG+CHS in the presence or absence of C22:0-CoA. 0.05% M- $\beta$ -CD was  
102 also tested as the control group. The data points were fitted with a Michaelis-Menten equation. All  
103 data points represent means of three independent measurements (n=3). Error bars indicate standard  
104 deviation. Source data are provided as a Source Data file. **c**, Superposition of ATP-bound ABCD1  
105 (rose) and ATP-bound ABCD4 (PDB ID:6bjj, gray). **d**, The density maps for ATP-Mg<sup>2+</sup> molecules  
106 are contoured at 5 $\sigma$ . ATP molecules are shown as yellow sticks; Mg<sup>2+</sup> ions are displayed as green  
107 spheres. Walker A and signature motif are colored in yellow and green, respectively. **e**, The  
108 TM3/TM3' and TM4b/TM4b' in C22:0-CoA- and ATP-bound ABCD1 are shown in cartoon,  
109 respectively. The residues at the cytosolic gate are shown as sticks and salt bridges are shown as  
110 dotted lines.

111

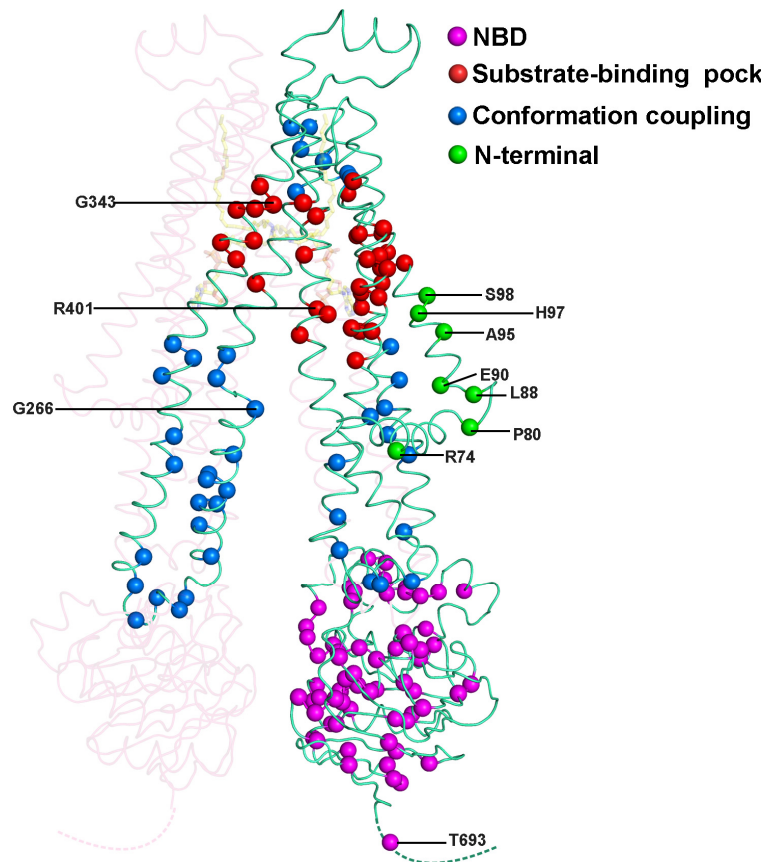

112

113

114 **Supplementary Fig. 8 Distribution of X-ALD associated pathogenic variants in ABCD1.** The  
115 four groups of mutant residues are represented as dots in different colors. The unfolded C-terminus  
116 of ABCD1 are shown as dotted line. The pathogenic variants discussed in this manuscript are  
117 labelled.



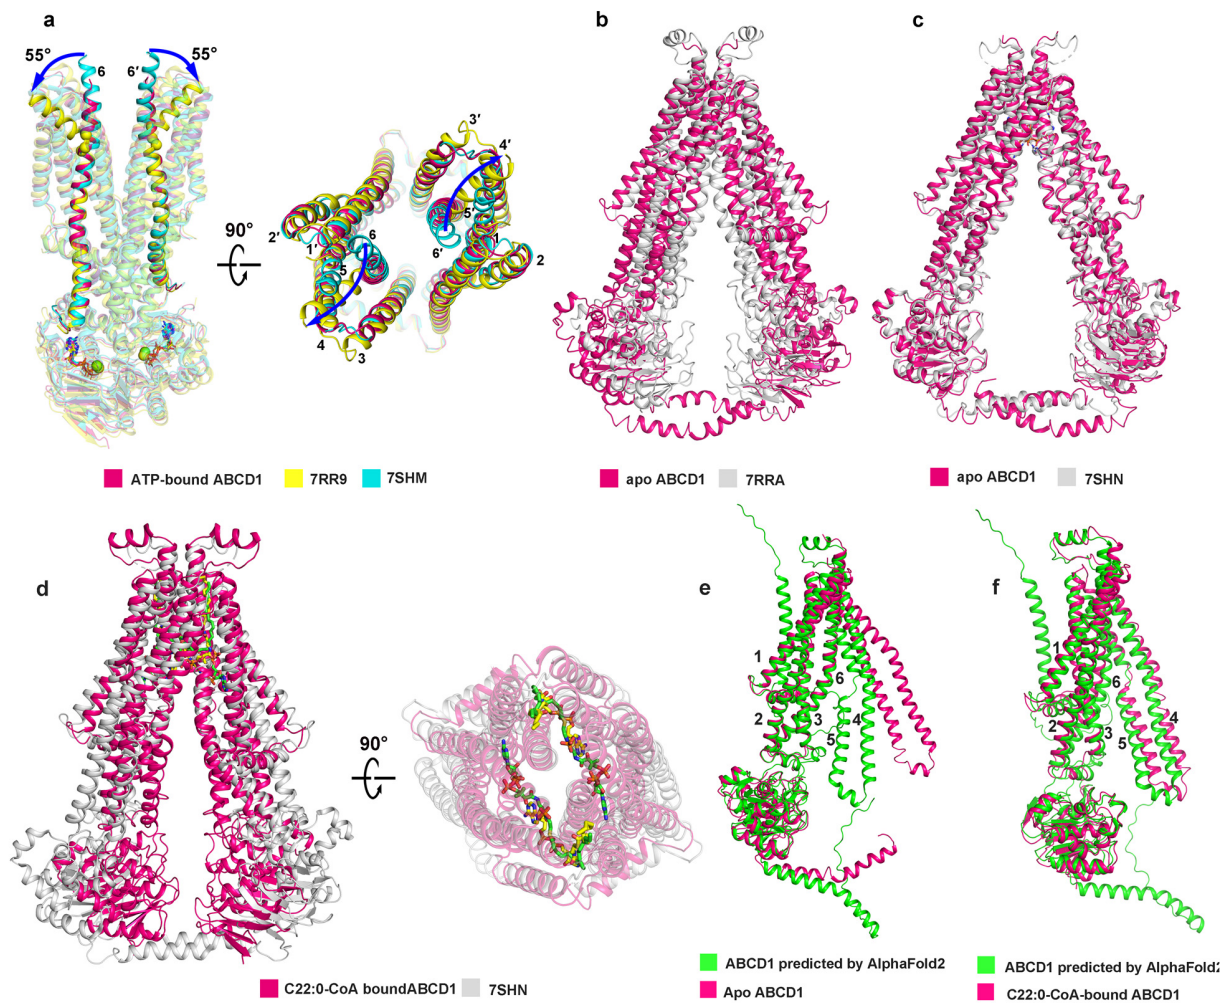

118

119 **Supplementary Fig. 9 Structural superpositions of our ABCD1 structures against the**

120 **recently reported ABCD1 structures (labelled with corresponding PDB codes). a, Structural**

121 **superposition of reported ATP-bound ABCD1 structures. b and c, Structural superposition of our**

122 **apo-form ABCD1 structure with the other reported apo-form structures respectively. d,**

123 **Structural superposition of our apo-form structure with the oleyl-CoA-bound structure. The**

124 **oleyl-CoA and C22:0-CoA are shown as yellow and green sticks, respectively. e and f, Structural**

125 **superposition of our apo-form ABCD1 protomers with predicated ABCD1 protomer by**

126 **AlphaFold2. Protomers form apo-form ABCD1 and C22:0-CoA-bound ABCD1 are superposed**

127 **with the predicated protomer, respectively.**

Supplementary Table 1 Cryo-EM data collection, refinement and validation statistics.

|                                                     | Apo ABCD1<br>(EMDB-32152)<br>(PDB 7VWC) | C22:0-CoA-bound<br>ABCD1<br>(EMDB-32224)<br>(PDB 7VZB) | ATP-bound<br>ABCD1<br>(EMDB-32171)<br>(PDB 7VX8) |
|-----------------------------------------------------|-----------------------------------------|--------------------------------------------------------|--------------------------------------------------|
| <b>Data collection and processing</b>               |                                         |                                                        |                                                  |
| Magnification                                       | 22,500                                  | 22,500                                                 | 81,000                                           |
| Voltage (kV)                                        | 300                                     | 300                                                    | 300                                              |
| Electron exposure (e <sup>-</sup> /Å <sup>2</sup> ) | 60                                      | 60                                                     | 54                                               |
| Defocus range (µm)                                  | -2.0 to -1.5                            | -2.0 to -1.5                                           | -2.0 to -1.8                                     |
| Pixel size (Å)                                      | 1.07                                    | 1.07                                                   | 1.07                                             |
| Symmetry imposed                                    | C1                                      | C2                                                     | C2                                               |
| Initial particle images (no.)                       | 4,094,944                               | 6,943,977                                              | 1,878,754                                        |
| Final particle images (no.)                         | 360,311                                 | 336,741                                                | 550,864                                          |
| Map resolution (Å)                                  | 3.5                                     | 3.6                                                    | 2.8                                              |
| FSC threshold                                       | 0.143                                   | 0.143                                                  | 0.143                                            |
| Map resolution range (Å)                            | 2.9-4.1                                 | 2.9-4.1                                                | 2.2-3.0                                          |
| <b>Refinement</b>                                   |                                         |                                                        |                                                  |
| Initial model used (PDB code)                       | <i>ab initio</i>                        | <i>ab initio</i>                                       | 6bjb                                             |
| Model resolution (Å)                                | 3.5                                     | 3.6                                                    | 2.8                                              |
| FSC threshold                                       | 0.143                                   | 0.143                                                  | 0.143                                            |
| Map sharpening B factor (Å <sup>2</sup> )           | -117.5                                  | -185.8                                                 | -116.8                                           |
| Model composition                                   |                                         |                                                        |                                                  |
| Non-hydrogen atoms                                  | 9,854                                   | 9,463                                                  | 9,018                                            |
| Protein residues                                    | 1,223                                   | 1,172                                                  | 1,120                                            |
| Ligands                                             | Two PE molecules                        | Two CHS and Two C22:0-CoA molecules                    | Two ATP molecules and Two Mg <sup>2+</sup>       |
| <i>B</i> factors (Å <sup>2</sup> )                  |                                         |                                                        |                                                  |
| Protein                                             | 61.77                                   | 89.73                                                  | 39.77                                            |
| Ligand                                              | 51.01                                   | 57.83                                                  | 28.26                                            |
| R.m.s. deviations                                   |                                         |                                                        |                                                  |
| Bond lengths (Å)                                    | 0.010                                   | 0.009                                                  | 0.009                                            |
| Bond angles (°)                                     | 0.975                                   | 0.889                                                  | 0.992                                            |
| Validation                                          |                                         |                                                        |                                                  |
| MolProbity score                                    | 2.06                                    | 2.10                                                   | 1.77                                             |
| Clashscore                                          | 10.52                                   | 14.43                                                  | 7.41                                             |
| Poor rotamers (%)                                   | 0.38                                    | 0.00                                                   | 1.06                                             |
| Ramachandran plot                                   |                                         |                                                        |                                                  |
| Favored (%)                                         | 91.13                                   | 91.91                                                  | 95.13                                            |
| Allowed (%)                                         | 8.87                                    | 8.09                                                   | 4.87                                             |
| Disallowed (%)                                      | 0.00                                    | 0.00                                                   | 0.00                                             |

130 **Supplementary Table 2 The X-ALD associated pathogenic variants in ABCD1.** Four groups  
 131 of X-ALD associated pathogenic variants in ABCD1 are listed, which are displayed in  
 132 Supplementary Fig. 8. The residues in the NBD, substrate-binding pocket, conformation coupling  
 133 and N-terminal are colored in magenta, red, blue and green, respectively, the same color as those  
 134 in the Supplementary Fig. 8.

|                                                                                   |                            |                                  |
|-----------------------------------------------------------------------------------|----------------------------|----------------------------------|
| P484D                                                                             | S633R                      | R113C, R113P                     |
| L493P                                                                             | V635M                      | L114P                            |
| M501L                                                                             | S636I                      | G116R, G116D, G116E              |
| L503P, L503M                                                                      | D638Y                      | A119D                            |
| G507S, G507D                                                                      | E640K                      | R120P                            |
| N509I (Walker A motif, ATP-binding residue)                                       | A646P                      | L154P                            |
| G510S, G510D (Walker A motif, ATP-binding residue)                                | L654P                      | L158P                            |
| C511Y (Walker A motif, ATP-binding residue)                                       | L655P                      | L160P                            |
| G512S, G512D (Walker A motif, ATP-binding residue)                                | T658I                      | R163C, Arg163H, Arg163L, Arg163P |
| K513Q, K513R (Walker A motif, ATP-binding residue)                                | R660W, R660Q, R660P        | L166P                            |
| S514R, S514G, S514I, S514N<br>(Walker A motif, Mg <sup>2+</sup> -binding residue) | L663Q                      | Y174D, Y174S                     |
| S515F (Walker A motif, Mg <sup>2+</sup> -binding residue)                         | H667D, H667L               | Q178E                            |
| L516P                                                                             | T668P, T668I               | Y181C                            |
| R518G, R518Y, R518Q (ATP-binding residue)                                         | H669Y, H669R               | R182P                            |
| L520P                                                                             | W679R,                     | R189W                            |
| G522R                                                                             | T693M                      | D194N, D194H                     |
| L523F                                                                             | S103R                      | E199K                            |
| P525S                                                                             | R104C, R104H               | D200N                            |
| G529S, G529D                                                                      | T105P, T105I,              | A205E                            |
| K533E, K533N                                                                      | T107P                      | S262W                            |
| P534S, P534L, P534R                                                               | S108L, S108W               | P263L                            |
| F540                                                                              | W137S                      | G266R, G266E                     |
| P543S, P543L                                                                      | A141T                      | A273E                            |
| Q544K, Q544R (Q-loop, Mg <sup>2+</sup> and ATP-binding residue)                   | P143A, P143S, P143H, P143L | R275W                            |
| Y547C                                                                             | V147G                      | K276E                            |
| M548V                                                                             | N148D, N148Y, N148S        | G277R, G277W                     |
| S552P                                                                             | S149N, S149R               | L279P                            |
| R554H                                                                             | R152S, R152P               | R280C, R280L                     |
| Q556R                                                                             | L211P                      | H283Y, H283D, H283R              |
| Y559C                                                                             | S213C                      | R285G, R285P                     |
| P560L, P560R                                                                      | N214D                      | E291K, E291G, E291D              |
| D561V,                                                                            | K217E                      | E292K                            |
| M566K, M566K, M556T                                                               | P218S                      | A294T,                           |
| L576P                                                                             | L220P                      | Y296C                            |
| R591Y, R591L, R591P, R591Q (ATP-binding residue)                                  | D221G                      | G298S, G298D                     |
| G594R                                                                             | V224G                      | E302K, E302Q,                    |
| A597G                                                                             | L229P                      | L313P                            |
| L605Q                                                                             | A245D                      | Q316P                            |
| S606P, S606A, S606L (Signature motif, ATP-binding residue)                        | T254A, 254P, T254M         | L322P                            |
| G607D (Signature motif, ATP-binding residue)                                      | K336M, K336N               | R324C                            |
| G608S (Signature motif, ATP-binding residue)                                      | Y337H                      | L325P                            |
| E609K, E609G (Signature motif, ATP-binding residue)                               | W339R, W339S               | T382P                            |
| A616T, A616V                                                                      | A341D                      | R389G                            |
| R617S, R617D, R617G, R617S, R617G, R617C, R617H                                   | S342P                      | R74W                             |
| Y620H, Y620C                                                                      | G343S, G343V               | P84L                             |
| A626T                                                                             | L344P                      | C88W                             |
| L628P                                                                             | L392V                      | E90K                             |
| D629N, D629H                                                                      | A396T                      | A95D                             |
| E630K (Walker B motif, ATP-binding residue)                                       | R401W, R401G, R401Q        | H97P, H97L                       |
| C631R, C631Y, C630W                                                               | I402N                      | S98P, S98L, S98W                 |
| T632P, T632I                                                                      | S404P                      |                                  |

135
